# Supplementary material for: Inhibition of Histone deacetylase 1 (HDAC1) and HDAC2 enhances CRISPR/Cas9 genome editing
Source: bioRxiv or medRxiv preprint supplement (doi:10.1101/670554), 2019-06-13
Supplement: Supplementary file [file media-1.pdf]

Supplementary

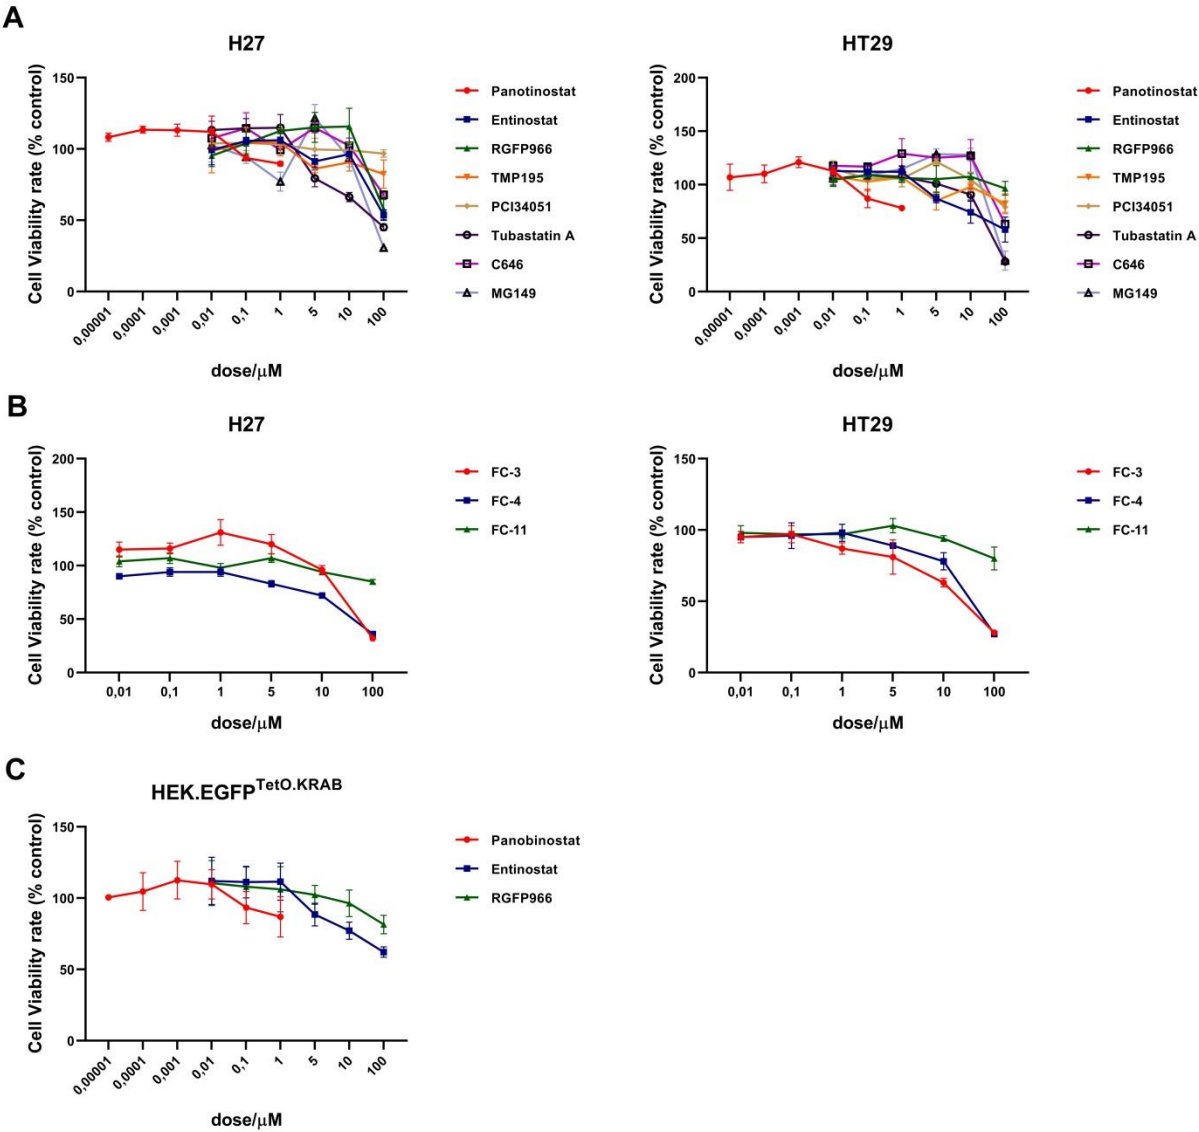

**Figure S1 Cell viability assessment with HDAC/HDAT inhibitors treatment.** Cells were treated with inhibitors at indicated dose for 24 h, and cell viability was determined by MTS assay. Data in bar graphs are represented as mean  $\pm$  SD (n $\geq$ 3).

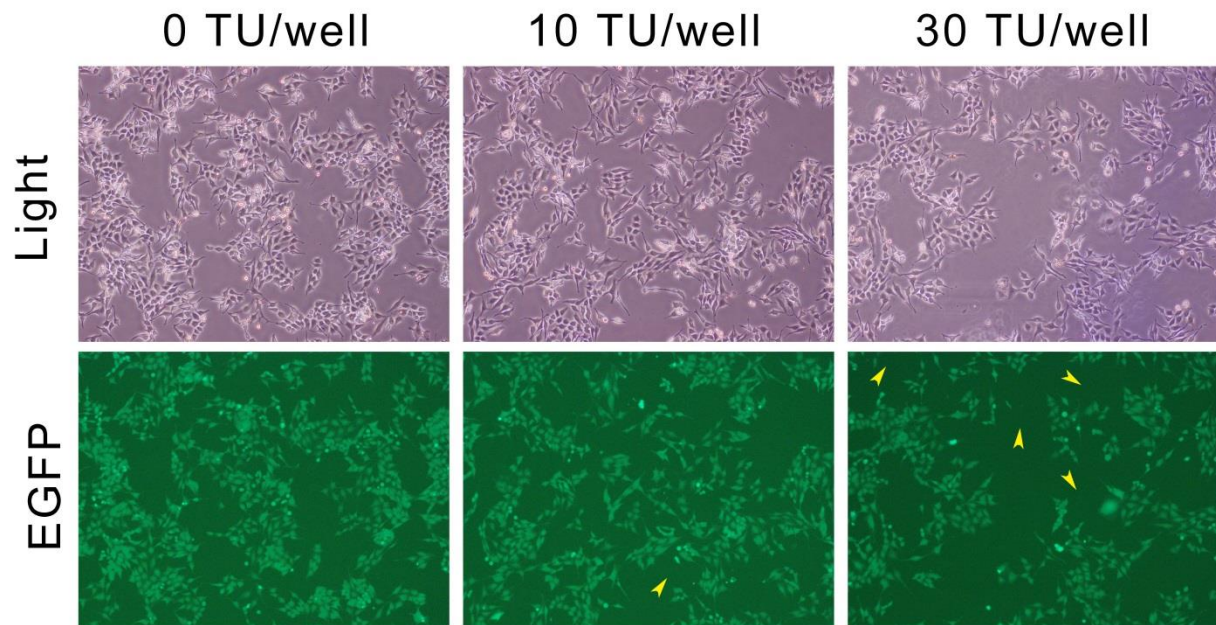

**Figure S2 A MOI of 30 TU/cells is suitable for AdV-Cas9 and AdV-gRNA co-transduction.** Fluorescence microscopy of H27 cells transduced with 0, 10, 30 or 100TU/well of both AdV-Cas9 and AdV-gRNA without fluorescence (upper panel) and with EGFP fluorescence (lower panel). The yellow arrows show the EGFP knockout cells.

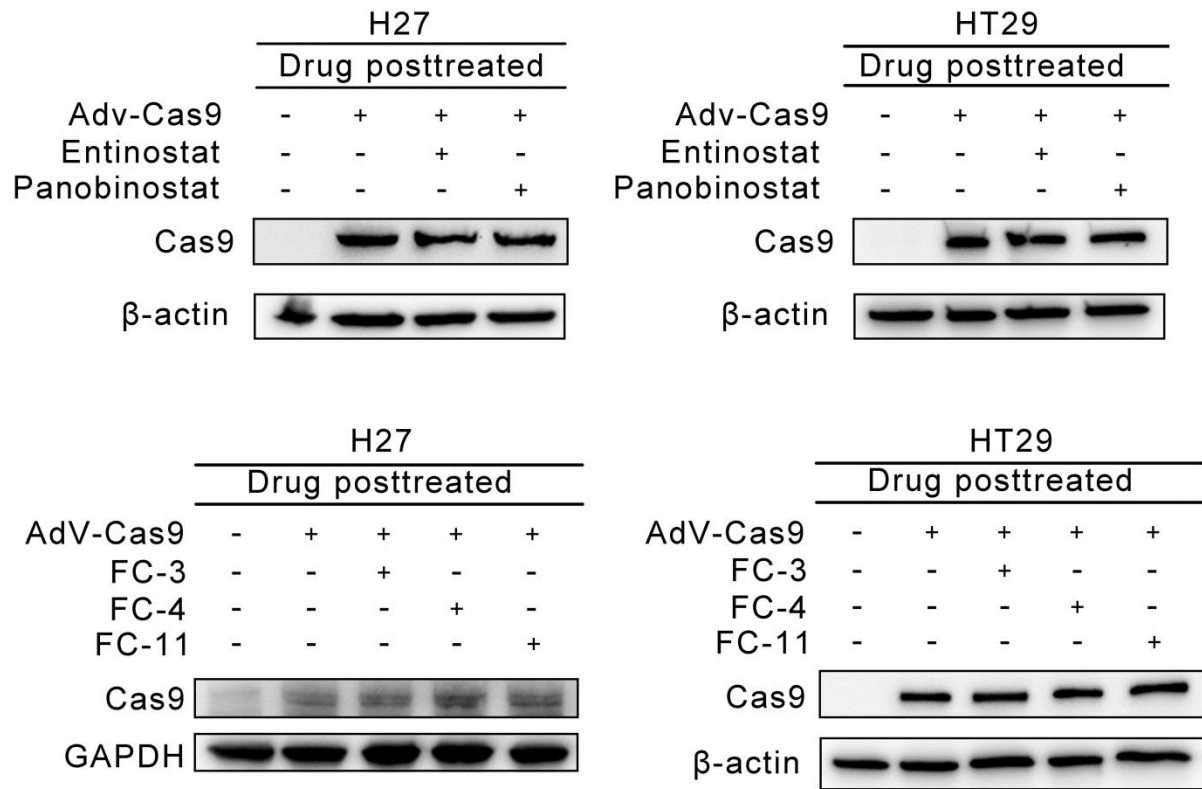

**Figure S3.** Western blot analysis of AdV-Cas9 protein expression with post-treatment of HDAC inhibitors using the same dose as shown in knockout for 48 hr.

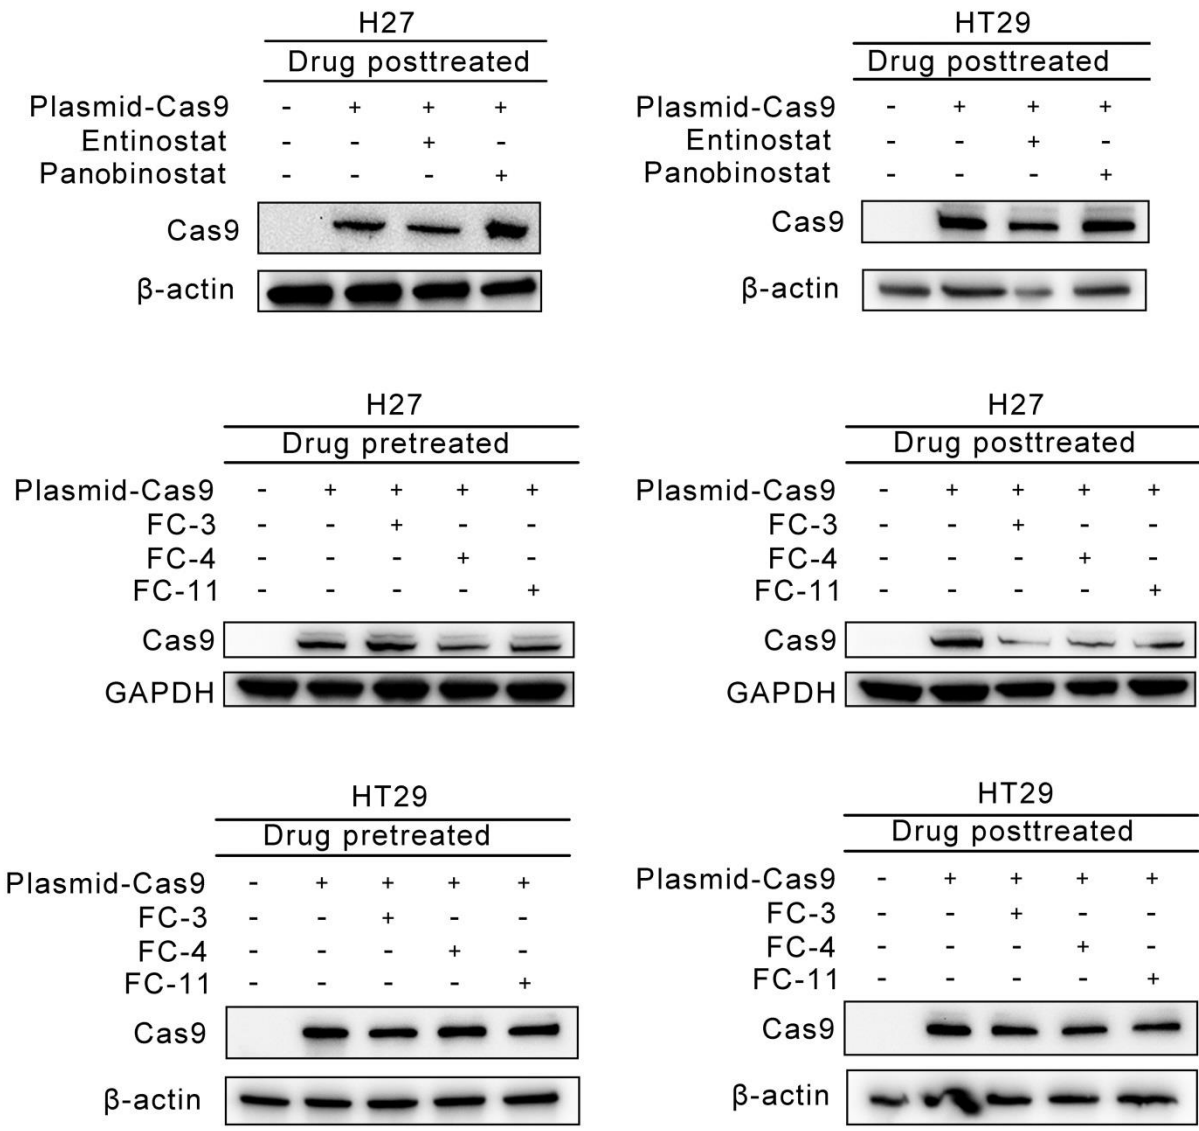

**Figure S4.** Western blot analysis of plasmid Cas9 protein expression with pre-treatment or post-treatment of HDAC inhibitors using the same dose as shown in gene editing study.

**Supplementary Table S1. List of primers used for HDACs RT-qPCR**

| <b>Name</b> | <b>Strand</b> | <b>Sequence</b>             |
|-------------|---------------|-----------------------------|
| HDAC-1      | F             | 5'-GGAAATCTATCGCCCTCACA -3' |
|             | R             | 5'-AACAGGCCATCGAATACTGG -3' |
| HDAC-2      | F             | 5'-AGACTGCAGTTGCCCTTGAT -3' |
|             | R             | 5'-TGCGCAAATTTTCAAACAAA -3' |
| HDAC-3      | F             | 5'-TGGCTTCTGCTATGTCAACG -3' |
|             | R             | 5'- CCCGGTCAGTGAGGTAGAAA-3' |
| GAPDH       | F             | 5'-ACCCAGAAGACTGTGGATGG -3' |
|             | R             | 5'-TCTAGACGGCAGGTCAGGTC -3' |
